# Supplementary material for: Evaluating the Integration of Palliative Care in Uganda’s Referral Hospitals: A Case Study of Fort Portal Regional Referral Hospital
Source: Research Square preprint supplement (doi:10.21203/rs.3.rs-8373194/v1), 2026-01-16
Supplement: Supplementary file 1 [file 244af0618b0674cbee1a2a68.pdf]

**Evaluating the Integration of Palliative Care in Uganda's Referral Hospitals: A Case Study of Fort  
Portal Regional Referral Hospital  
Data collection Instrument (Tally Sheet)**

| <b>Year</b> | <b>Category</b>  | <b>Potentially Needed PC</b> | <b>Received PC</b> |
|-------------|------------------|------------------------------|--------------------|
| 2019/2020   | Cancer           |                              |                    |
|             | HIV              |                              |                    |
|             | SCD              |                              |                    |
|             | Others           |                              |                    |
|             | Adult males      |                              |                    |
|             | Adult females    |                              |                    |
|             | Children females |                              |                    |
|             | Children males   |                              |                    |
| Total       |                  |                              |                    |
| 2020/2021   | Cancer           |                              |                    |
|             | HIV              |                              |                    |
|             | SCD              |                              |                    |

|           |                  |  |  |
|-----------|------------------|--|--|
|           | Others           |  |  |
|           | Adult males      |  |  |
|           | Adult females    |  |  |
|           | Children females |  |  |
|           | Children males   |  |  |
| Total     |                  |  |  |
| 2021/2022 | Cancer           |  |  |
|           | HIV              |  |  |
|           | SCD              |  |  |
|           | Others           |  |  |
|           | Adult males      |  |  |
|           | Adult females    |  |  |
|           | Children females |  |  |
|           | Children males   |  |  |
| Total     |                  |  |  |

|           |                  |  |  |
|-----------|------------------|--|--|
| 2022/2023 | Cancer           |  |  |
|           | HIV              |  |  |
|           | SCD              |  |  |
|           | Others           |  |  |
|           | Adult Males      |  |  |
|           | Adult females    |  |  |
|           | Children females |  |  |
|           | Children males   |  |  |
| Total     |                  |  |  |
| 2023/2024 | Cancer           |  |  |
|           | HIV              |  |  |
|           | SCD              |  |  |
|           | Others           |  |  |
|           | Adult Males      |  |  |
|           | Adult females    |  |  |
|           | Children         |  |  |

|           |                   |  |  |
|-----------|-------------------|--|--|
|           | females           |  |  |
|           | Children<br>males |  |  |
| Total     |                   |  |  |
| 2024/2025 | Cancer            |  |  |
|           | HIV               |  |  |
|           | SCD               |  |  |
|           | Others            |  |  |
|           | Adult Males       |  |  |
|           | Adult females     |  |  |
|           | Children females  |  |  |
|           | Children males    |  |  |
| Total     |                   |  |  |

**Activities identified from annual reports:**

- 1.
- 2.

- 3.
- 4.
- 5.
- 6.
