# Supplementary material for: Evaluating the Integration of Palliative Care in Uganda’s Referral Hospitals: A Case Study of Fort Portal Regional Referral Hospital
Source: Research Square preprint supplement (doi:10.21203/rs.3.rs-8373194/v1), 2026-01-16
Supplement: Supplementary file 1 [file dbc3df47e7d814ee49ed800e.xlsx]

## Sheet: Sheet1
		Cancer needed	Cancer received	HIV needed	HIV Received	SCD needed	SCD received		Total Needed	Total Received
2019/2020		234	197	315	7	104	0		653	204
2020/2021		156	232	207	0	378	0		741	232
2021/2022		164	162	290	3	866	34		1320	199
2022/2023		31	105	0	1	11	64		42	170
2023/2024		60	140	0	0	811	19		871	159
2024/2025		434	123	325	5	421	16		1180	144
Total		1079	959	1137	16	2591	133		4807	1108
	Total Needed	Total Received
Cancer	1079	959
HIV	1137	16
SCD	2591	133

## Sheet: Sheet2
	2019/2020		2020/2021		2021/2022		2022/2023		2023/2024		2024/2025		Total	Total Adults	Total Children		Total males	Total female
Adult males	119		135		121		90		69		72		606
Adult Females	156		181		119		111		156		224		947	1553	104		665	992
Children males	5		1		14		20		6		13		59
Children Females	8		0		10		10		2		15		45
Total inpatients ecounters											116
Overall Total Number of patients	288		317		264		231		233		440		1773
	Received	Needed	Received	Needed	Received	Needed	Received	Needed	Received	Needed	Received	Needed
Cancer	197	234	232	156	162	164	105	31	140	60	123	434	959
HIV	7	315	0	207	3	290	1	0	0	0	5	324	16
SCD	0	104	0	378	34	866	64	11	19	811	16	840	133
Others	84		85		65		61		74		180		549
Total	288		317		264		231		233		324		1657
Overall Total														1773
Inpatient encounters 2024/2025											116
Out patient (2024/2025)											324
Note; Inpatient encounters for 2024/2024 were obtained from EAFYA. those of the other years were recorded in the same registers as opd patients and are included in respective totals
Palliative care activities identified
daily out patient clinic to review patients and their family
Dail Review of inpatients
Management of Inpatients and outpatients for symptom control and psychosocial and spiritual support
Collaborate with other specialists on the wards to link patients to the unit and for care planning
Linking patients to health facilities nearest to them
Referral to the national referral hospital
Patient follow-up (phone call)
CMEs for staff and students
Research
Outreaches to lower facilities
Support supervision of palliative care services in lower health facilities
Coordinating continuity of care with health facilities
